# Supplementary material for: Interface engineering triggered by carbon nanotube-supported multiple sulfides for boosting oxygen evolution
Source: Royal Society of Chemistry journal article supplement (doi:10.1039/d1nr04540g), 2021-01-01
Supplement: d1nr04540g1.pdf [file d1nr04540g1.pdf]

# Interface Engineering Triggered by Carbon Nanotubes-Supported Multiple Sulfides for Boosting Oxygen Evolution

Ming Chen<sup>‡a</sup>, Yiping Hu<sup>‡a</sup>, Kun Liang<sup>a</sup>, Ziming Zhao<sup>a</sup>, Yutong Luo<sup>a</sup>, Sha Luo<sup>a</sup> and Jiantai Ma<sup>\*a</sup>

a. State Key Laboratory of Applied Organic Chemistry (SKLAOC), Gansu Provincial Engineering Laboratory for Chemical Catalysis, College of Chemistry and Chemical Engineering, Lanzhou University, Lanzhou, 730000, PR China.

<sup>‡</sup> Ming Chen and Yiping Hu contributed equally to this work.

Corresponding Autor, Jantai Ma\*; E-mail address: majiantai@lzu.edu.cn (J. Ma)

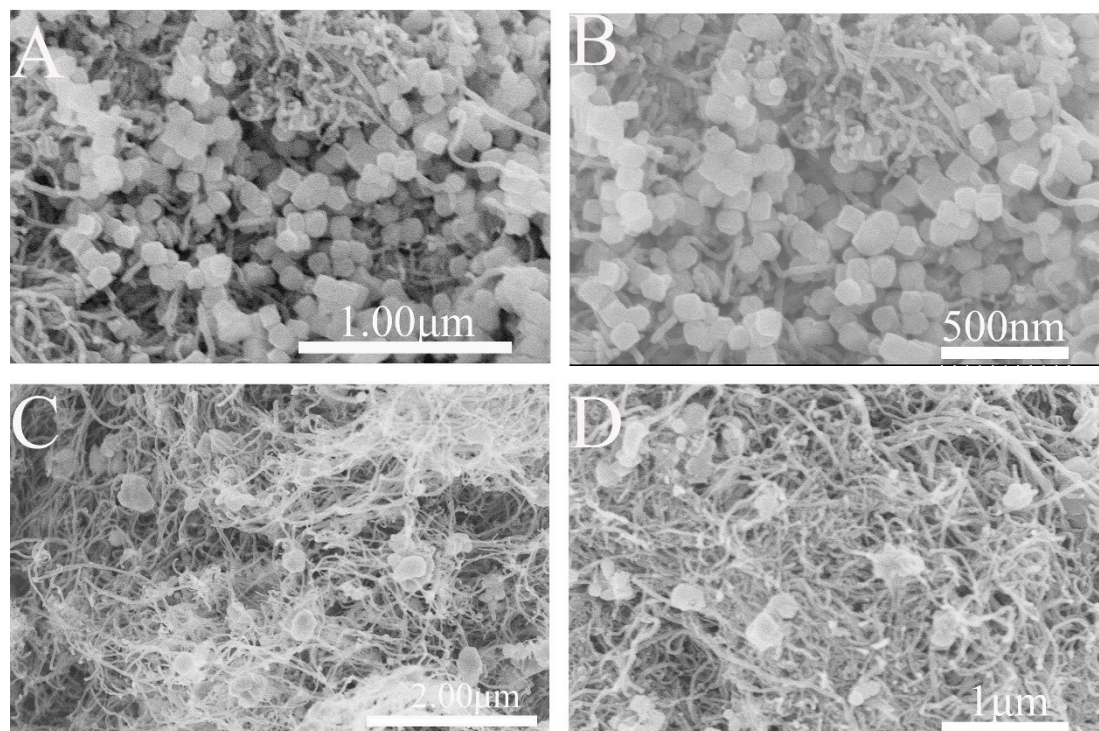

**Figure S1** SEM image of CoFe PBA/CNTs (A, B) and S-CoFe/CNTs (C, D)

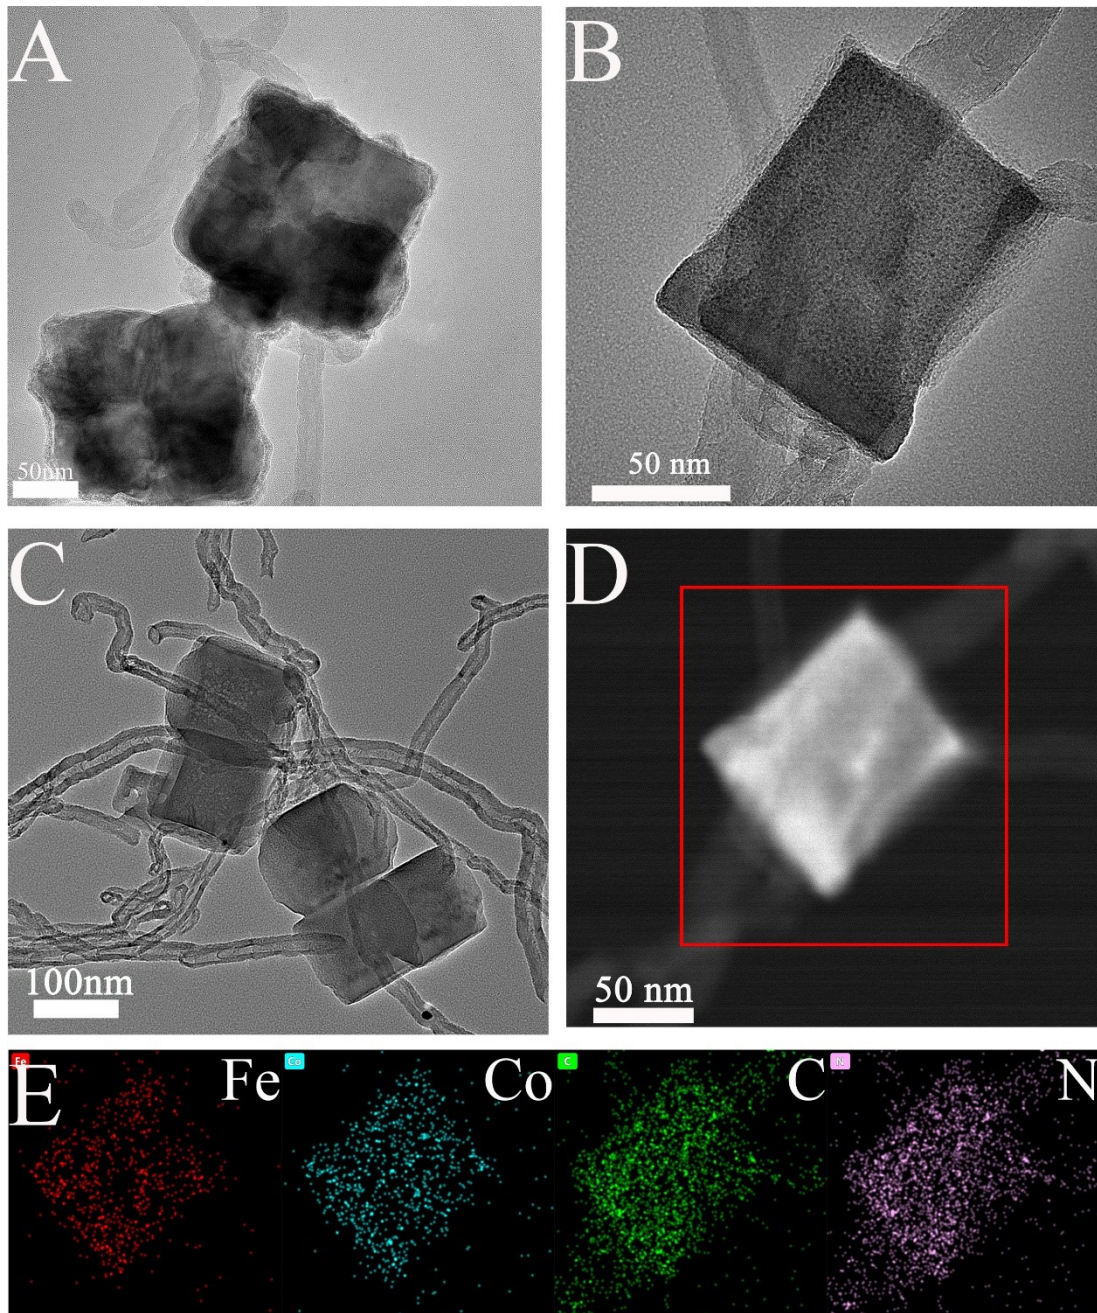

**Figure S2** TEM images (A) of multi-individual S-CoFe/CNTs , (B) one individual CoFe PBA/CNTs , (C) multi-individual CoFe PBA/CNTs (D) Dark field TEM of CoFe PBA/CNTs, (E) EDS elemental mapping of the CoFe PBA/CNTs refers to the signals of Co, Fe, C and N respectively as marked in (C).

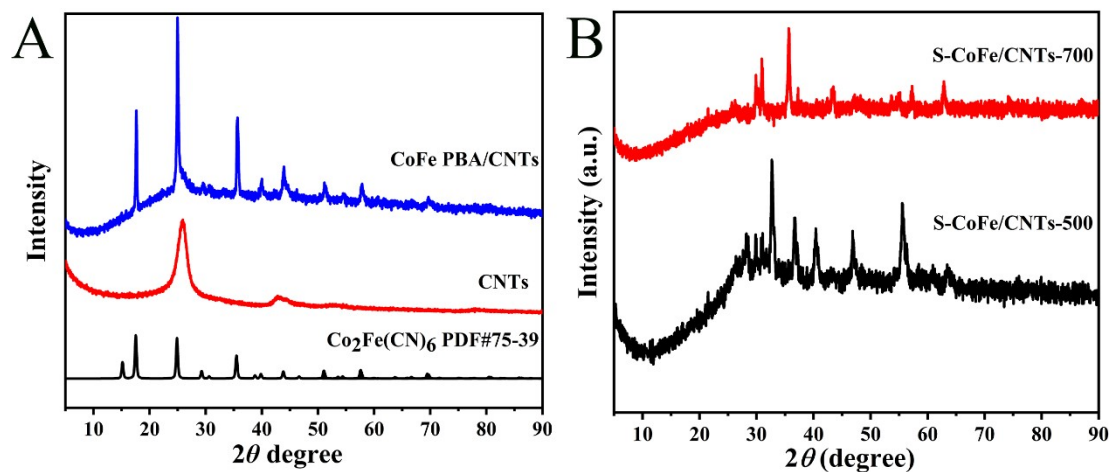

**Figure S3 (A) XRD patterns of CoFe PBA/CNTs samples; (B) XRD diffractograms of S-CoFe/CNTs-700 and S-CoFe/CNTs-500**

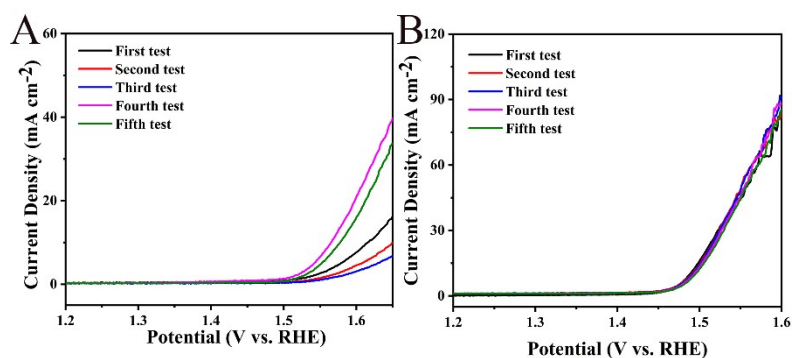

**Figure S4 (A) The polarization curve of S-CoFe /CNTs prepared at 400°C for five tests ; (B) The polarization curve of S-CoFe /CNTs prepared at 500°C for five tests**

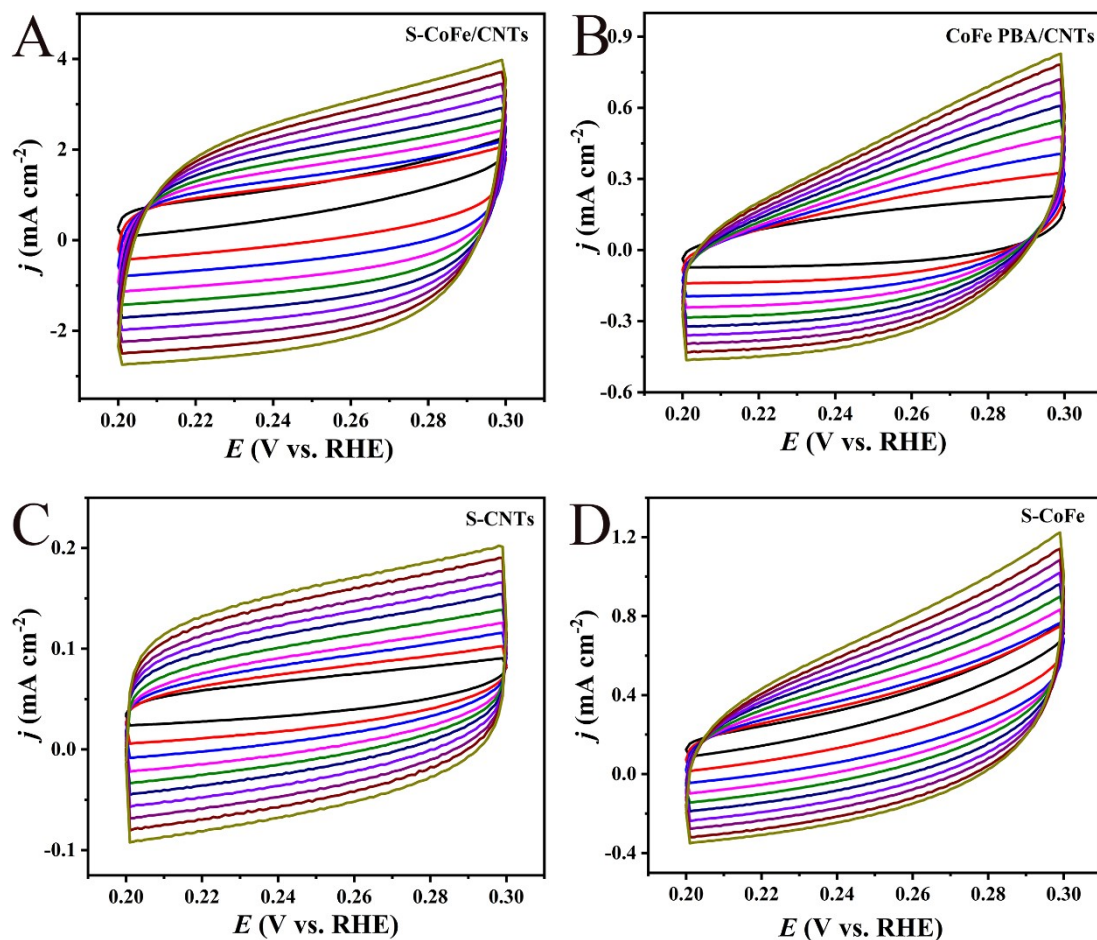

**Figure S5** CV curves of the (A) S-CoFe/CNTs, (B) CoFe PBA/CNTs, (C) S-CNTs and (D) S-CoFe at different scan rates from 10 to 100 mV s<sup>-1</sup>.

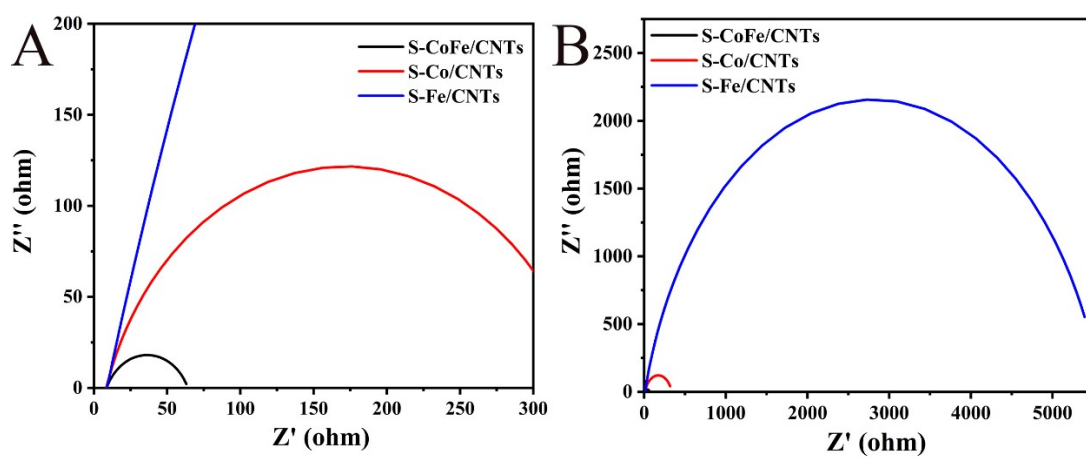

**Figure S6** (A) local enlarged images of image (B); (B) Nyquist diagrams of EIS for S-CoFe/CNTs, S-Co/CNTs and S-Fe/CNTs;

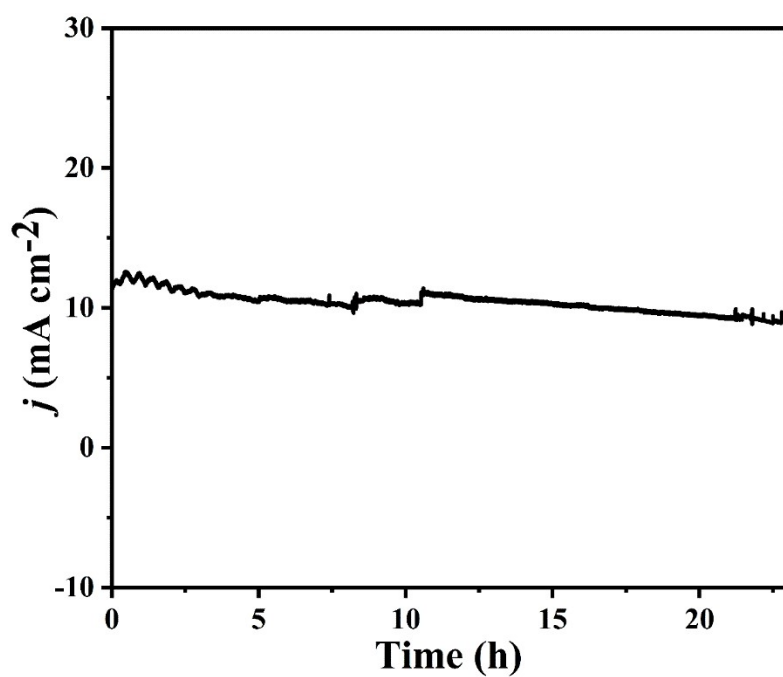

Figure S7 Amperometric i-t curve of S-CoFe/CNTs

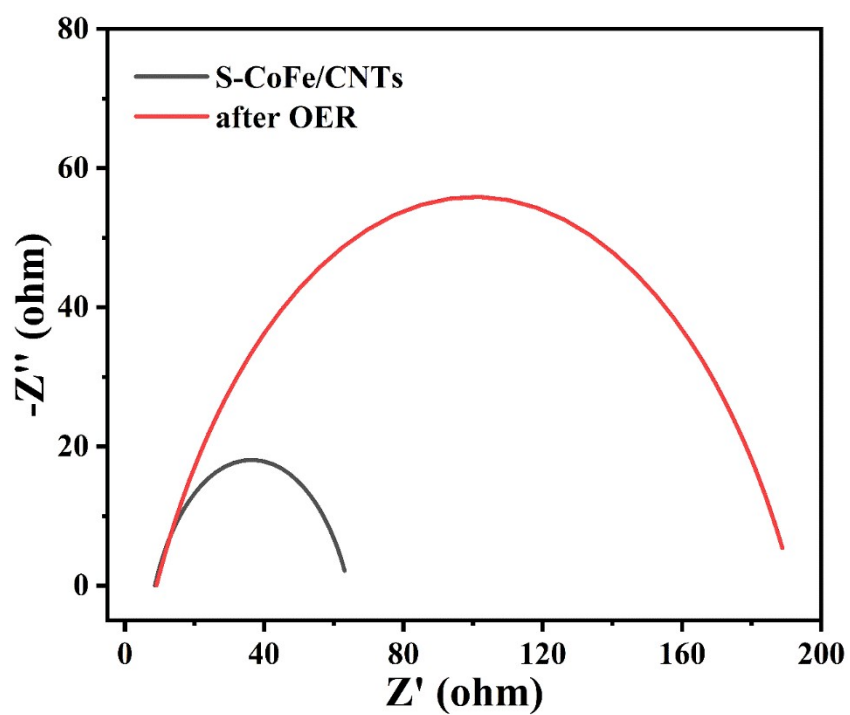

Figure S8 Nyquist diagrams of EIS for S-CoFe/CNTs before and after the OER test

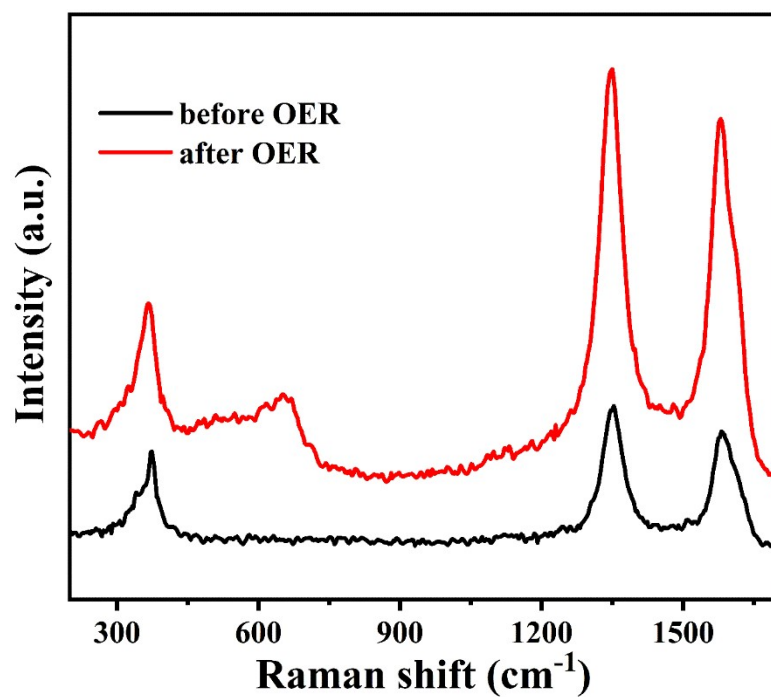

Figure S9 Raman spectra of S-CoFe/CNTs before after OER test

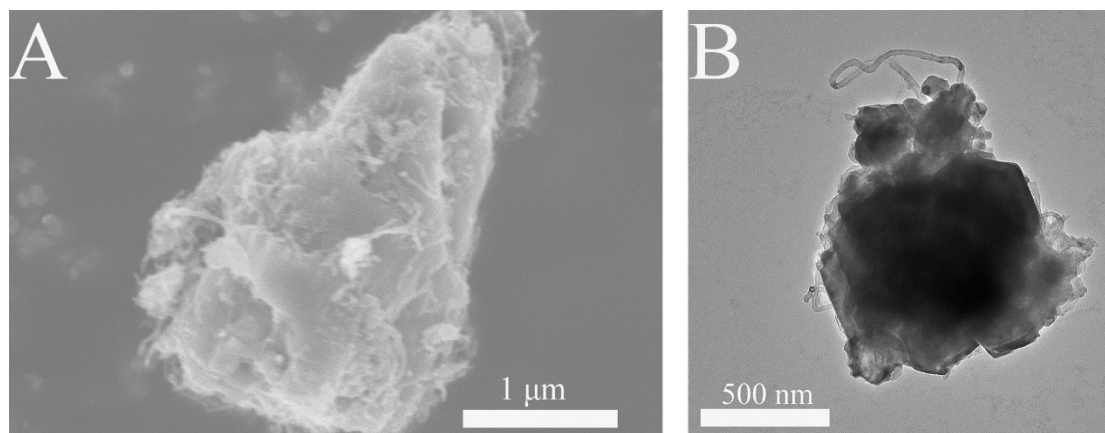

Figure S10 (A) SEM image and (B) TEM image of S-CoFe/CNTs after OER test

**Table S1** The comparison of other OER catalysts derived from Prussian blue analogue in alkaline medium.

| Materials                                                 | Overpotential (mV) @10mA cm <sup>-2</sup> | Reference |
|-----------------------------------------------------------|-------------------------------------------|-----------|
| S-CoFe/CNTs                                               | 253                                       | This work |
| CoFe@NC-NCNT-H                                            | 380                                       | 1         |
| CoSe <sub>2</sub> NBs                                     | 335                                       | 2         |
| PBA@POM                                                   | 440                                       | 3         |
| NiCoO <sub>x</sub> -400                                   | 280                                       | 4         |
| Ni <sub>x</sub> Co <sub>3-x</sub> O <sub>4</sub> /NF      | 287                                       | 5         |
| Ni <sub>2</sub> Fe-O                                      | 370                                       | 6         |
| CoFe PBA/CoS <sub>2</sub> -12                             | 301                                       | 7         |
| FeCoP-400                                                 | 261                                       | 8         |
| Fe <sub>0.5</sub> Co <sub>0.5</sub> MoO <sub>4</sub> -xSx | 263                                       | 9         |
| CoP-NPC                                                   | 308                                       | 10        |
| PB@Met-700                                                | 330                                       | 11        |

**Table S2** The comparison of OER performance of other TMSs catalysts in alkaline medium.

| Materials                                                            | Overpotential (mV) @10 mA cm <sup>-2</sup> | Reference |
|----------------------------------------------------------------------|--------------------------------------------|-----------|
| S-CoFe/CNTs                                                          | 253                                        | This work |
| Cu <sub>9</sub> S <sub>5</sub> /NF                                   | 298                                        | 12        |
| Co <sub>0.25</sub> Fe <sub>0.75</sub> S <sub>2</sub>                 | 270                                        | 13        |
| Ni-Fe-OH/Ni <sub>3</sub> S <sub>2</sub> /NF                          | 268                                        | 14        |
| CNTs/N-Cu <sub>2</sub> S-<br>5cyc                                    | 280                                        | 15        |
| Ni <sub>3</sub> S <sub>4</sub> /N,P-HPC                              | 370                                        | 16        |
| CuS <sub>2</sub> nanorods                                            | 270                                        | 17        |
| CoS <sub>2</sub> @MXene                                              | 270                                        | 18        |
| Fe/C-doped-MoS <sub>2</sub> /Ni <sub>3</sub> S <sub>2</sub> -<br>450 | 270                                        | 19        |

**Table S3** The Integral table of Co and Fe peak area in XPS data of catalyst before and after OER test

|                                    | Before OER test |       | After OER test |       |
|------------------------------------|-----------------|-------|----------------|-------|
|                                    | 2p1/2           | 2p3/2 | 2p1/2          | 2p3/2 |
| Co <sup>2+</sup> /Co <sup>3+</sup> | 4.172           | 4.176 | 0.475          | 0.477 |
| Fe <sup>2+</sup> /Fe <sup>3+</sup> | 2.705           | 2.701 | 0.538          | 0.531 |

## Reference

1. Z. X. Shang, Z. L. Chen, Z. B. Zhang, J. Yu, S. Z. Tan, F. Ciucci, Z. P. Shao, H. Lei and D. J. Chen, *J. Alloy. Compd.*, 2018, **740**, 743-753.
2. V. Ganesan and J. Kim, *Mater. Lett.*, 2018, **223**, 49-52.
3. Y. Y. Wang, Y. Wang, L. Zhang, C. S. Liu and H. Pang, *Chem-Asian. J.*, 2020, **15**, 2035-2035.
4. B. L. Chen, Z. X. Yang, Q. J. Niu, H. Chang, G. P. Ma, Y. Q. Zhu and Y. D. Xia, *Electrochem Commun.*, 2018, **93**, 191-196.
5. Y. Shen, S. G. Guo, F. Du, X. B. Yuan, Y. T. Zhang, J. Q. Hu, Q. Shen, W. J. Luo, A. Alsaedi, T. Hayat, G. H. Wen, G. L. Li, Y. Zhou and Z. G. Zou, *Nanoscale*, 2019, **11**, 11765-11773.
6. Z. H. Xie, C. Zhang, X. He, Y. Liang, D. D. Meng, J. Q. Wang, P. Liang and Z. H. Zhang, *Front. Chem.*, 2019, **7**, 00539.
7. H. Xu, H. Y. Shang, L. J. Jin, C. Y. Chen, C. Wang and Y. K. Du, *J. Mater. Chem. A*, 2019, **7**, 26905-26910.
8. X. Ding, W. Uddin, H. T. Sheng, P. Li, Y. X. Du and M. Z. Zhu, *J. Alloy Compd.*, 2020, **814**, 152332.
9. B. Fei, Z. L. Chen, Y. Ha, R. R. Wang, H. Y. Yang, H. B. Xu and R. B. Wu, *Chem. Eng. J.*, 2020, **394**, 124926.
10. X. Y. Zhou, L. Xu, Y. N. Gao, L. Li, J. J. Tang and J. Yang, *Sustain. Energ. Fuels.*, 2020, **4**, 2411-2421.
11. Y. B. Lian, K. F. Shi, H. J. Yang, H. Sun, P. W. Qi, J. Ye, W. B. Wu, Z. Deng and Y. Peng, *Small*, 2020, **16**, 1907368.
12. B. Chakraborty, S. Kalra, R. Beltran-Suito, C. Das, T. Hellmann, P. W. Menezes and M. Driess, *Chem-Asian. J.*, 2020, **15**, 852-859.
13. L. F. Gao, C. Y. Guo, X. J. Liu, X. J. Ma, M. Z. Zhao, X. Kuang, H. Yang, X. J. Zhu, X. Sun and Q. Wei, *New J. Chem.*, 2020, **44**, 1711-1718.
14. W. J. He, G. Ren, Y. Li, D. B. Jia, S. Y. Li, J. N. Cheng, C. C. Liu, Q. Y. Hao, J. Zhang and H. Liu, *Catal. Sci. Technol.*, 2020, **10**, 1708-1713.
15. J. J. Hou, X. M. Zhou, Z. Yang and H. G. Nie, *J. Nanopart. Res.*, 2020, **22**, 12.
16. X. J. Hu, T. C. Li, Y. D. Tang, Y. R. Wang, A. Wang, G. T. Fu, X. D. Li and Y. W. Tang, *Chem-Eur. J.*, 2019, **25**, 7561-7568.
17. S. B. Kale, P. T. Babar, J. H. Kim and C. D. Lokhande, *New J. Chem.*, 2020, **44**, 8771-8777.
18. S. L. Han, Y. Chen, Y. N. Hao, Y. Y. Xie, D. Y. Xie, Y. Chen, Y. X. Xiong, Z. Y. He, F. Hu, L. L. Li, J. X. Zhu and S. J. Peng, *Sci. China Mater.*, 2021, **64**, 1127-1138.
19. X. F. Lv, G. S. Liu, S. Liu, W. T. Chen, D. H. Cao, T. Z. Song, N. N. Wang and Y. Q. Zhu, *Crystals*, 2021, **11**, 340.
